# Supplementary material for: Gene-Set Enrichment Analysis of Differentially Expressed Genes of Amniotic-Fluid RNA Providing Insights into the Phenotype of Turner&rsquo;s Syndrome<strong> </strong>
Source: Preprints.org preprint supplement (doi:10.20944/preprints201810.0268.v1), 2018-10-12
Supplement: Supplementary file 1 [file supplementary]

## Sheet: Sheet1
Transcription
ARCHS4 TFs Coexp
Index	Name	P-value	Adjusted p-value	Z-score	Combined score
1	ALX3_human_tf_ARCHS4_coexpression	0.002162	0.07256	-2.26	13.84
2	ZFP92_human_tf_ARCHS4_coexpression	0.07256	0.07256	-2.25	5.91
3	ZNF705A_human_tf_ARCHS4_coexpression	0.07256	0.07256	-2.1	5.52
4	ZNF518A_human_tf_ARCHS4_coexpression	0.07256	0.07256	-1.97	5.16
5	ZNF512_human_tf_ARCHS4_coexpression	0.07256	0.07256	-1.91	5.01
TRANSFAC and JASPAR PWMs
Index	Name	P-value	Adjusted p-value	Z-score	Combined score
1	E2F6 (human)	0.04014	0.4745	-1.72	5.52
2	ZBTB7A (human)	0.04096	0.4745	-1.72	5.48
3	TFAP2A (mouse)	0.05832	0.4745	-1.66	4.72
4	IRF8 (mouse)	0.06534	0.4745	-1.63	4.44
5	MZF1_1-4 (human)	0.1383	0.4745	-1.89	3.75
Pathways
Reactome 2016
Index	Name	P-value	Adjusted p-value	Z-score	Combined score
1	Human Cytomegalovirus and Map Kinase Pathways_Homo sapiens_h_hcmvPathway	0.003994	0.01022	-1.41	7.8
2	Phosphorylation of MEK1 by cdk5/p35 down regulates the MAP kinase pathway_Homo sapiens_h_cdk5Pathway	0.003495	0.01022	-1.35	7.66
3	Cadmium induces DNA synthesis and proliferation in macrophages_Homo sapiens_h_cdMacPathway	0.003994	0.01022	-1.38	7.6
4	Melanocyte Development and Pigmentation Pathway_Homo sapiens_h_melanocytepathway	0.003246	0.01022	-1.15	6.62
5	Regulation of Splicing through Sam68_Homo sapiens_h_sam68Pathway	0.002498	0.01022	-1.04	6.21
BioCarta 2016
Index	Name	P-value	Adjusted p-value	Z-score	Combined score
1	Human Cytomegalovirus and Map Kinase Pathways_Homo sapiens_h_hcmvPathway	0.003994	0.01022	-1.41	7.8
2	Phosphorylation of MEK1 by cdk5/p35 down regulates the MAP kinase pathway_Homo sapiens_h_cdk5Pathway	0.003495	0.01022	-1.35	7.66
3	Cadmium induces DNA synthesis and proliferation in macrophages_Homo sapiens_h_cdMacPathway	0.003994	0.01022	-1.38	7.6
4	Melanocyte Development and Pigmentation Pathway_Homo sapiens_h_melanocytepathway	0.003246	0.01022	-1.15	6.62
5	Regulation of Splicing through Sam68_Homo sapiens_h_sam68Pathway	0.002498	0.01022	-1.04	6.21
